# Supplementary material for: Copper-catalyzed S-methylation of sulfonyl hydrazides with TBHP for the synthesis of methyl sulfones in water
Source: Royal Society of Chemistry journal article supplement (doi:10.1039/c6gc03142k), 2016-11-28

## Supporting Information

### Copper-catalyzed S-methylation of sulfonyl hydrazides with TBHP for the synthesis of methyl sulfones in water

*Yu Yang, Yajie Bao, Qianqian Guan, Qi Sun, Zhenggen Zha and Zhiyong Wang*

*Hefei National Laboratory for Physical Sciences at Microscale, CAS Key Laboratory of Soft Matter Chemistry and Department of Chemistry & Collaborative Innovation Center of Suzhou Nano Science and Technology, University of Science and Technology of China, Hefei, 230026, P. R. China. Fax: (+86) 551-360-3185; E-mail: zwang3@ustc.edu.cn.*

#### Contents:

|                                                                              |           |
|------------------------------------------------------------------------------|-----------|
| <b>General remarks.....</b>                                                  | <b>S2</b> |
| <b>General procedures for the synthesis of Arylsulfonyl Hydrazides .....</b> | <b>S2</b> |
| <b>GC-MS analysis for the TEMPO-CH<sub>3</sub> adduct 4.....</b>             | <b>S3</b> |
| <b>Characterization data of products.....</b>                                | <b>S4</b> |
| <b>Reference.....</b>                                                        | <b>S7</b> |
| <b>NMR Spectra of products.....</b>                                          | <b>S8</b> |

## General Remarks

All substrates were purchased commercially without further purification. The yields were determined based on sulfonyl hydrazides.

<sup>1</sup>H and <sup>13</sup>C NMR spectra were recorded on a Bruker AC-300 FT spectrometer at 400 MHz and 100 MHz, respectively, with tetramethylsilane as an internal reference. Chemical shifts ( $\delta$ ) and coupling constants ( $J$ ) were expressed in ppm and Hz, respectively. High resolution mass spectra (HRMS) were recorded on a LC-TOF spectrometer (Micromass). GC-MS samples were recorded on an Agilent Technologies 7890A-5975C GC-MS system.

## General procedures for the synthesis of Arylsulfonyl Hydrazides

Arylsulfonyl hydrazides **2b-2s** were prepared according to the literature procedure.<sup>[1]</sup> To a solution of an arylsulfonyl chloride (3.0 mmol) in tetrahydrofuran (15 mL), was added hydrazine monohydrate (375 mg, 7.5 mmol) dropwise under nitrogen at 0 °C. After vigorous stirring for 30 min at 0 °C, the reaction mixture was added ethyl acetate (60 mL), and washed with saturated brine (3 x 10 mL). The organic layer was dried over sodium sulfate, filtered, concentrated and added to hexane (12 mL) over 5 min. The mixture was filtered, and the collected solid was dried in vacuum.

# GC-MS analysis for the TEMPO-CH<sub>3</sub> adduct 4

File : F:\Lichao\YY.D  
Operator : manager  
Acquired : 28 Oct 2016 13:04 using AcqMethod TEST.M  
Instrument : GC-MS  
Sample Name : YY  
Misc Info :  
Vial Number : 1

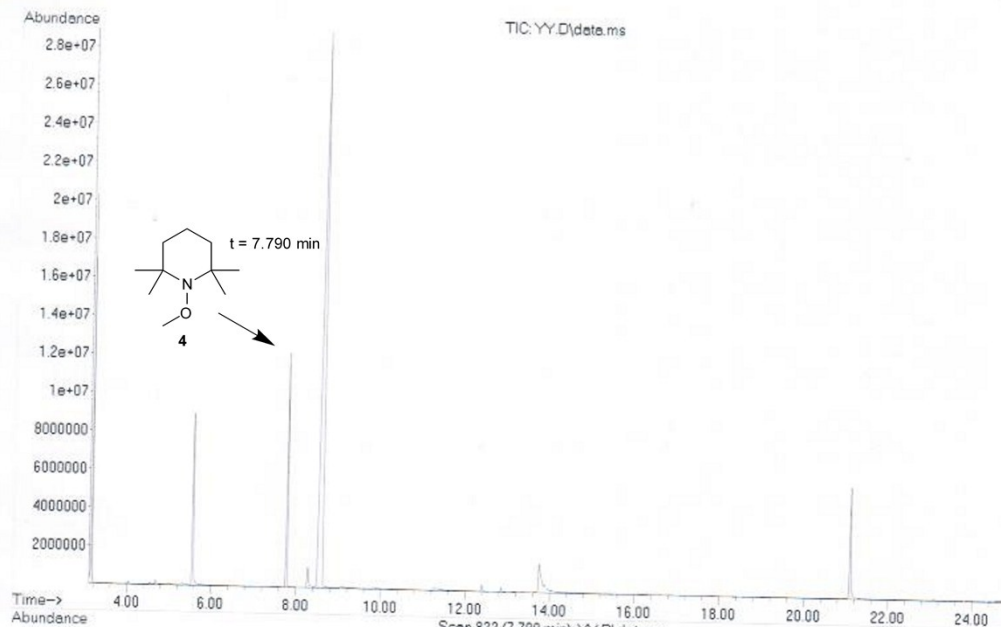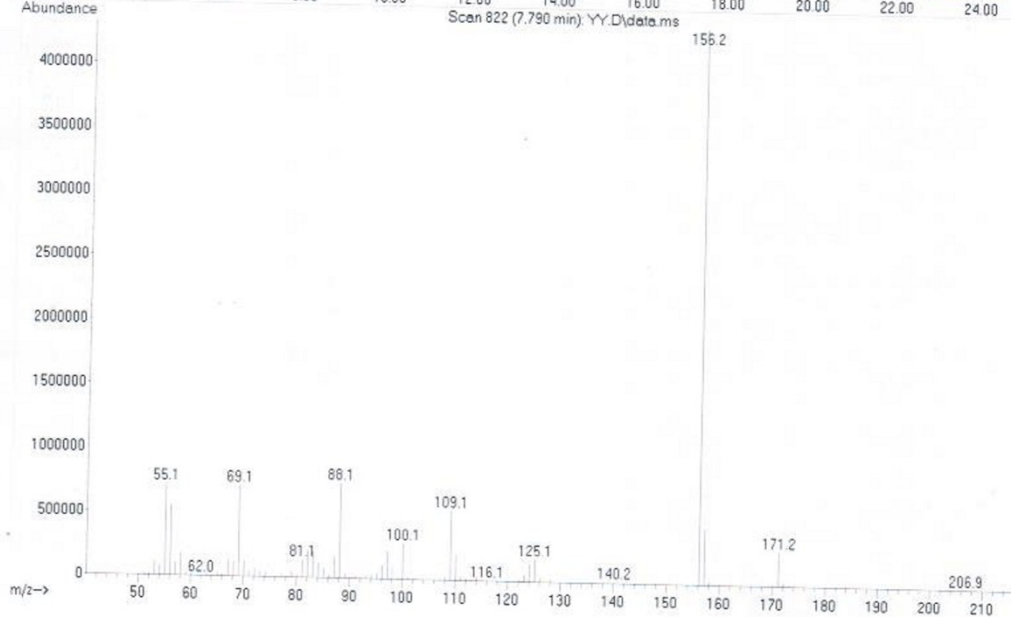

## Characterization data of products

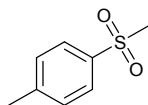

**1-methyl-4-(methylsulfonyl)benzene (3aa).**<sup>[1]</sup> The title compound was prepared according to the general procedure and purified by column chromatography (Petroleum Ether: EtOAc = 3:1) to give a white solid (88 % yield). <sup>1</sup>H NMR (400 MHz, CDCl<sub>3</sub>): 7.84-7.82 (d, 2H, *J* = 8.0 Hz), 7.38-7.36 (d, 2H, *J* = 8.0 Hz), 3.04 (s, 3H), 2.46 (s, 3H); <sup>13</sup>C NMR (100 MHz, CDCl<sub>3</sub>): 144.7, 137.7, 130.0, 127.3, 44.6, 21.6.

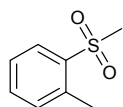

**1-methyl-2-(methylsulfonyl)benzene (3ba).**<sup>[1]</sup> The title compound was prepared according to the general procedure and purified by column chromatography (Petroleum Ether: EtOAc = 3:1) to give a light yellow oil (83 % yield). <sup>1</sup>H NMR (400 MHz, CDCl<sub>3</sub>): 8.04-8.02 (m, 1H), 7.53-7.51 (m, 1H), 7.40-7.28 (m, 2H), 3.08 (s, 3H), 2.72 (s, 3H); <sup>13</sup>C NMR (100 MHz, CDCl<sub>3</sub>): 138.7, 137.5, 133.7, 132.7, 129.2, 126.7, 43.7, 20.3.

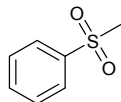

**methylsulfonylbenzene (3ca).**<sup>[1]</sup> The title compound was prepared according to the general procedure and purified by column chromatography (Petroleum Ether: EtOAc = 3:1) to give a light yellow oil (78 % yield). <sup>1</sup>H NMR (400 MHz, CDCl<sub>3</sub>): 7.97-7.94 (m, 2H), 7.69-7.65 (m, 1H), 7.60-7.56 (m, 2H), 3.04 (s, 3H); <sup>13</sup>C NMR (100 MHz, CDCl<sub>3</sub>): 140.6, 133.7, 129.4, 127.3, 44.5.

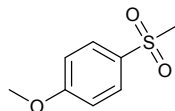

**1-methoxy-4-(methylsulfonyl)benzene (3da).**<sup>[1]</sup> The title compound was prepared according to the general procedure and purified by column chromatography (Petroleum Ether: EtOAc = 3:1) to give a light yellow solid (81 % yield). <sup>1</sup>H NMR (400 MHz, CDCl<sub>3</sub>): 7.89-7.85 (m, 2H), 7.05-7.01 (m, 2H), 3.89 (s, 3H), 3.03 (s, 3H); <sup>13</sup>C NMR (100 MHz, CDCl<sub>3</sub>): 163.7, 132.3, 129.5, 114.5, 55.7, 44.8.

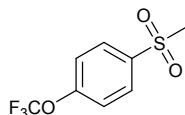

**1-(methylsulfonyl)-4-(trifluoromethoxy)benzene (3ea).**<sup>[2]</sup> The title compound was prepared according to the general procedure and purified by column chromatography (Petroleum Ether: EtOAc = 3:1) to give a light yellow oil (70% yield). <sup>1</sup>H NMR (400 MHz, CDCl<sub>3</sub>): 3.07 (s, 3H),

7.41 (d,  $J = 8.1$  Hz, 2H), 8.02 (d,  $J = 8.7$  Hz, 2H);  $^{13}\text{C}$  NMR (100 MHz,  $\text{CDCl}_3$ ): 43.5, 120.2, 120.5 (q,  $J = 258.3$  Hz), 128.8, 137.8, 152.0 (q,  $J = 1.5$  Hz).

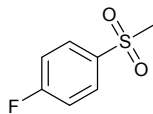

**1-fluoro-4-(methylsulfonyl)benzene (3fa).**<sup>[1]</sup> The title compound was prepared according to the general procedure and purified by column chromatography (Petroleum Ether: EtOAc = 3:1) to give a light yellow oil (90 % yield).  $^1\text{H}$  NMR (400 MHz,  $\text{CDCl}_3$ ): 8.00-7.96 (m, 2H), 7.28-7.24 (m, 2H), 3.07 (s, 3H);  $^{13}\text{C}$  NMR (100 MHz,  $\text{CDCl}_3$ ): 165.8 (d,  $J = 254$  Hz), 136.7 (d,  $J = 3$  Hz), 130.3 (d,  $J = 10$  Hz), 116.7 (d,  $J = 23$  Hz), 44.7.

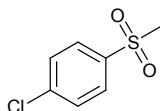

**1-chloro-4-(methylsulfonyl)benzene (3ga).**<sup>[1]</sup> The title compound was prepared according to the general procedure and purified by column chromatography (Petroleum Ether: EtOAc = 3:1) to give a white solid (84 % yield).  $^1\text{H}$  NMR (400 MHz,  $\text{CDCl}_3$ ): 7.91-7.88 (m, 2H), 7.57-7.54 (m, 2H), 3.06 (s, 3H);  $^{13}\text{C}$  NMR (100 MHz,  $\text{CDCl}_3$ ): 140.5, 139.1, 129.7, 128.9, 44.5.

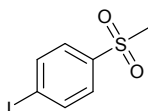

**1-iodo-4-(methylsulfonyl)benzene (3ha).**<sup>[3]</sup> The title compound was prepared according to the general procedure and purified by column chromatography (Petroleum Ether: EtOAc = 3:1) to give a white solid (58 % yield).  $^1\text{H}$  NMR (400 MHz,  $\text{CDCl}_3$ ): 7.96-7.94 (d, 2H,  $J = 8.0$  Hz), 7.67-7.65 (d, 2H,  $J = 8.0$  Hz), 3.05 (s, 3H);  $^{13}\text{C}$  NMR (100 MHz,  $\text{CDCl}_3$ ): 140.2, 138.7, 128.8, 101.6, 44.5.

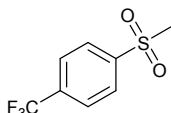

**1-(methylsulfonyl)-4-(trifluoromethyl)benzene (3ia).**<sup>[4]</sup> The title compound was prepared according to the general procedure and purified by column chromatography (Petroleum Ether: EtOAc = 3:1) to give a white solid (73 % yield).  $^1\text{H}$  NMR (400 MHz,  $\text{CDCl}_3$ ): 8.12-8.10 (d, 2H,  $J = 8.0$  Hz), 7.87-7.85 (d, 2H,  $J = 8$  Hz), 3.09 (s, 3H);  $^{13}\text{C}$  NMR (100 MHz,  $\text{CDCl}_3$ ): 144.0, 135.6 ( $J = 33$  Hz), 128.1, 126.6 (q,  $J = 7$  Hz), 123.1 (q,  $J = 272$  Hz), 44.3.

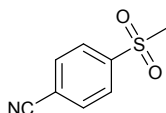

**4-(methylsulfonyl)benzonitrile (3ja).**<sup>[5]</sup> The title compound was prepared according to the general procedure and purified by column chromatography (Petroleum Ether: EtOAc = 3:1) to give a white solid (56 % yield).  $^1\text{H}$  NMR (400 MHz,  $\text{CDCl}_3$ ): 8.03-8.01 (d, 2H,  $J = 8.0$  Hz), 7.84-7.82 (d, 2H,  $J = 8.0$  Hz), 3.03 (s, 3H);  $^{13}\text{C}$  NMR (100 MHz,  $\text{CDCl}_3$ ): 143.5, 132.2, 127.2, 116.6, 116.0, 43.2.

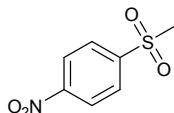

**1-(methylsulfonyl)-4-nitrobenzene (3ka).**<sup>[1]</sup> The title compound was prepared according to the general procedure and purified by column chromatography (Petroleum Ether: EtOAc = 3:1) to give a white solid (73 % yield). <sup>1</sup>H NMR (400 MHz, CDCl<sub>3</sub>): 8.45-8.43 (d, 2H, *J* = 8.0 Hz), 8.18-8.16 (d, 2H, *J* = 8.0 Hz), 3.13 (s, 3H); <sup>13</sup>C NMR (100 MHz, CDCl<sub>3</sub>): 150.9, 146.0, 129.0, 124.6, 44.3.

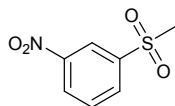

**1-(methylsulfonyl)-3-nitrobenzene (3la).**<sup>[6]</sup> The title compound was prepared according to the general procedure and purified by column chromatography (Petroleum Ether: EtOAc = 3:1) to give a light yellow solid (65 % yield). <sup>1</sup>H NMR (400 MHz, CDCl<sub>3</sub>): 8.81 (s, 1H), 8.55-8.52 (m, 1H), 8.32-8.29 (m, 1H), 7.86-7.82 (m, 1H), 3.15 (s, 3H); <sup>13</sup>C NMR (100 MHz, CDCl<sub>3</sub>): 148.5, 142.6, 133.0, 130.9, 128.3, 122.9, 44.4.

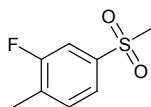

**2-fluoro-1-methyl-4-(methylsulfonyl)benzene (3na).** The title compound was prepared according to the general procedure and purified by column chromatography (Petroleum Ether: EtOAc = 3:1) to give a colorless oil (77 % yield). <sup>1</sup>H NMR (400 MHz, CDCl<sub>3</sub>): 7.65-7.57 (m, 2H), 7.43-7.39 (m, 1H), 3.05 (s, 3H); <sup>13</sup>C NMR (100 MHz, CDCl<sub>3</sub>): 160.9 (d, *J* = 249 Hz), 139.72, 132.5 (d, *J* = 6 Hz), 131.9 (d, *J* = 18 Hz), 122.9 (d, *J* = 4 Hz), 114.3 (d, *J* = 26 Hz), 44.5, 14.8 (d, *J* = 4 Hz). HRMS [M+H]<sup>+</sup> calcd. for C<sub>8</sub>H<sub>10</sub>FO<sub>2</sub>S: 189.0386, found : 189.0388.

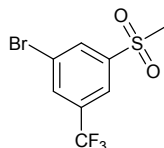

**1-bromo-3-(methylsulfonyl)-5-(trifluoromethyl)benzene (3oa).**<sup>[7]</sup> The title compound was prepared according to the general procedure and purified by column chromatography (Petroleum Ether: EtOAc = 3:1) to give a white solid (68 % yield). <sup>1</sup>H NMR (400 MHz, CDCl<sub>3</sub>): 8.29 (s, 1H), 8.15 (s, 1H), 8.05 (s, 1H), 3.13 (s, 3H); <sup>13</sup>C NMR (100 MHz, CDCl<sub>3</sub>): 143.4, 133.8, 133.7 (q, *J* = 68 Hz), 133.6 (q, *J* = 3 Hz), 124.1, 123.2 (q, *J* = 3 Hz), 122.2 (q, *J* = 271 Hz), 44.4.

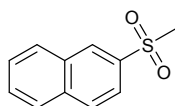

**2-(methylsulfonyl)naphthalene (3pa).**<sup>[8]</sup> The title compound was prepared according to the general procedure and purified by column chromatography (Petroleum Ether: EtOAc = 3:1) to give a white solid (81 % yield). <sup>1</sup>H NMR (400 MHz, CDCl<sub>3</sub>): 8.53 (s, 1H), 8.03-8.00 (m, 2H), 7.95-7.80 (m, 2H), 7.71-7.62 (m, 2H), 3.13 (s, 1H); <sup>13</sup>C NMR (100 MHz, CDCl<sub>3</sub>): 137.5, 135.3, 132.2, 129.7, 129.42, 129.3, 129.1, 128.0, 127.8, 122.1, 44.6.

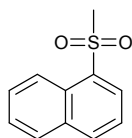

**1-(methylsulfonyl)naphthalene (3qa).**<sup>[5]</sup> The title compound was prepared according to the general procedure and purified by column chromatography (Petroleum Ether: EtOAc = 3:1) to give a light blue oil (59 % yield). <sup>1</sup>H NMR (400 MHz, CDCl<sub>3</sub>): 8.74-8.72 (m, 1H), 8.35-8.33 (m, 1H), 8.14-8.12 (m, 1H), 7.99-7.97 (m, 1H), 7.74-7.70 (m, 1H), 7.65-7.58 (m, 2H), 3.22 (s, 2H); <sup>13</sup>C NMR (100 MHz, CDCl<sub>3</sub>): 135.6, 135.2, 134.2, 129.7, 129.3, 128.8, 128.7, 127.1, 124.5, 123.9, 44.3.

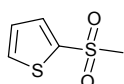

**2-(methylsulfonyl)thiophene (3ra).**<sup>[5]</sup> The title compound was prepared according to the general procedure and purified by column chromatography (Petroleum Ether: EtOAc = 3:1) to give a light yellow oli (69 % yield). <sup>1</sup>H NMR (400 MHz, CDCl<sub>3</sub>): 7.73-7.71 (m, 2H), 7.17-7.15 (m, 1H), 3.19 (s, 3H); <sup>13</sup>C NMR (100 MHz, CDCl<sub>3</sub>): 141.8, 133.7, 133.5, 127.9, 46.1.

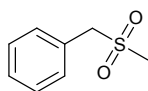

**(methylsulfonylmethyl)benzene (3sa).**<sup>[9]</sup> The title compound was prepared according to the general procedure and purified by column chromatography (Petroleum Ether: EtOAc = 3:1) to give a light yellow solid (71 % yield). <sup>1</sup>H NMR (400 MHz, CDCl<sub>3</sub>): 7.40 (m, 5H), 4.25 (s, 2H), 2.75 (s, 3H); <sup>13</sup>C NMR (100 MHz, CDCl<sub>3</sub>): 130.9, 130.5, 129.2, 129.0, 61.3, 39.0.

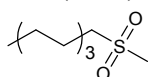

**1-(methylsulfonyl)octane (3ta).**<sup>[10]</sup> The title compound was prepared according to the general procedure and purified by column chromatography (Petroleum Ether: EtOAc = 3:1) to give a white solid (62 % yield). <sup>1</sup>H NMR (400 MHz, CDCl<sub>3</sub>): 3.02-2.98 (m, 2H), 2.89 (s, 3H), 1.89-1.81 (m, 2H), 1.46-1.41 (m, 2H), 1.32-1.28 (m, 8H), 0.90-0.87 (m, 3H); <sup>13</sup>C NMR (100 MHz, CDCl<sub>3</sub>): 54.9, 40.4, 31.7, 29.0, 28.9, 28.4, 22.6, 22.5, 14.1.

## Reference

- [1] G. Yuan, J. Zheng, X. Gao, X. Li, L. Huang, H. Chen and H. Jiang, *Chem. Commun.*, 2012, **48**, 7513.
- [2] J.-B. Liu, C. Chen, L. Chu, Z.-H. Chen, X.-H. Xu and F.-L. Qing, *Angew.Chem.Int.Ed.*, 2015, **54**, 11839.
- [3] R. H. Tale, G. K. Toradmal and V. B. Gopula, *RSC Adv.*, 2015, 5, 84910.
- [4] J. M. Baskin and Z. Wang, *Org. Lett.*, 2002, 25, 4423.
- [5] W. Zhu and D. Ma, *J. Org. Chem.*, 2005, **70**, 2696.
- [6] L. Huang, S.-S. Wang, J.-W. Zhao, L. Cheng and G.-Y. Yang, *J. Am. Chem. Soc.*, 2014, **136**, 7637.
- [7] J. Morstein, H. Hou, C. Cheng and J. F. Hartwig, *Angew.Chem.Int. Ed.*, 2016, **55**, 8054.
- [8] B. Yu, A.-H. Liu, L.-N. He, B. Li, Z.-F. Diao and Y.-N. Li, *Green Chem.*, 2012, **14**, 957.
- [9] L. Chen, Y. Yang and D. Jiang, *J. Am. Chem. Soc.*, 2010, **132**, 9138.
- [10] K. Kamata, T. Hirano and N. Mizuno, *Chem. Commun.*, 2009, 3958.

# NMR Spectra of products

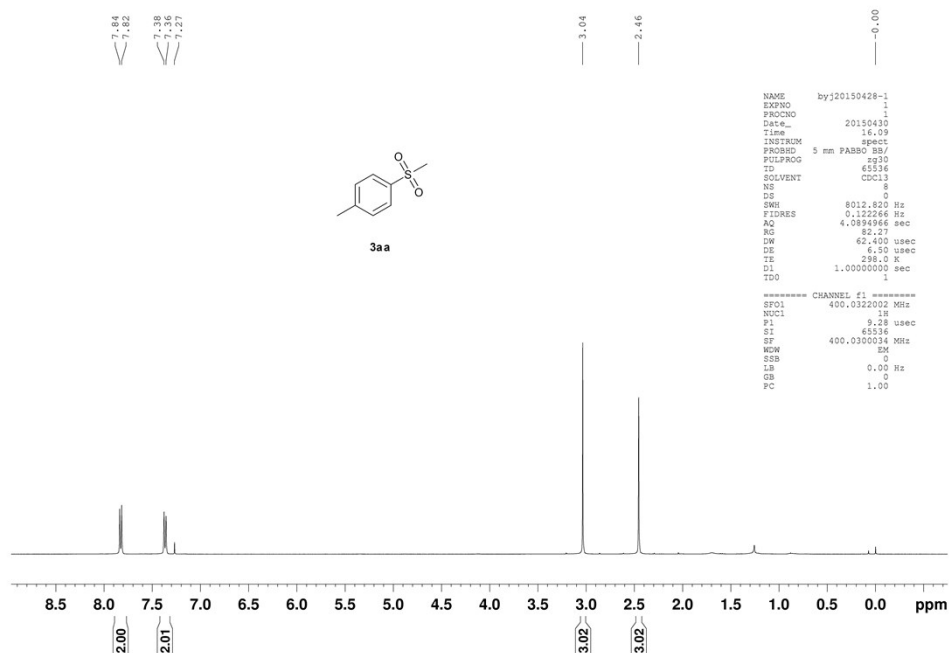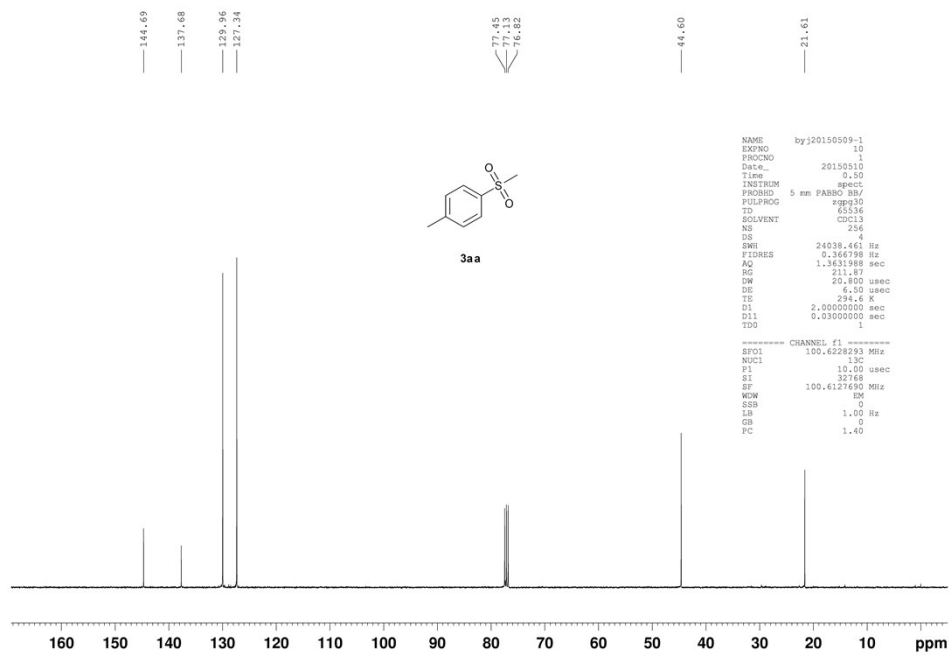



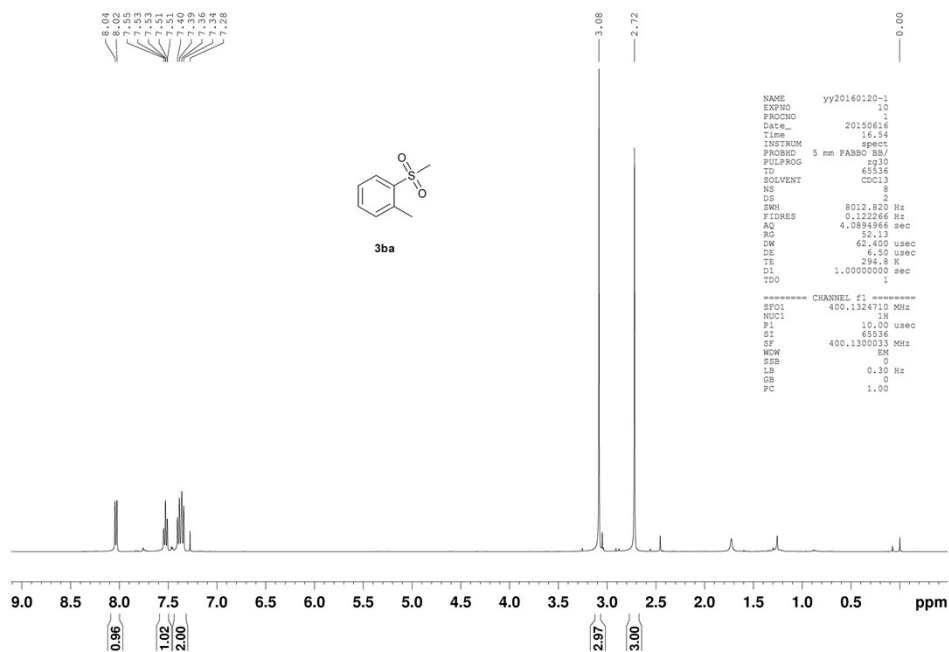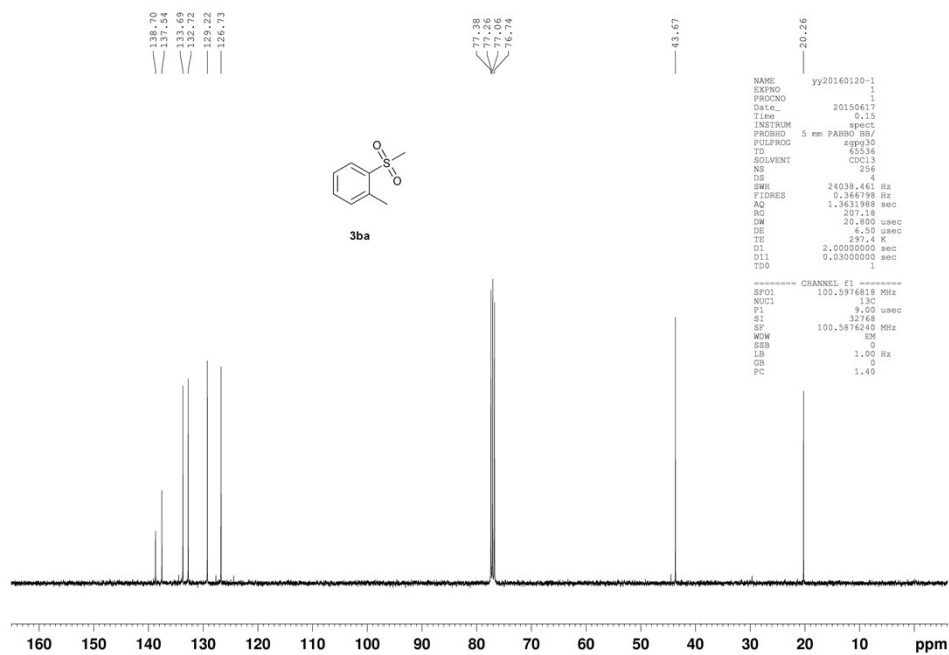



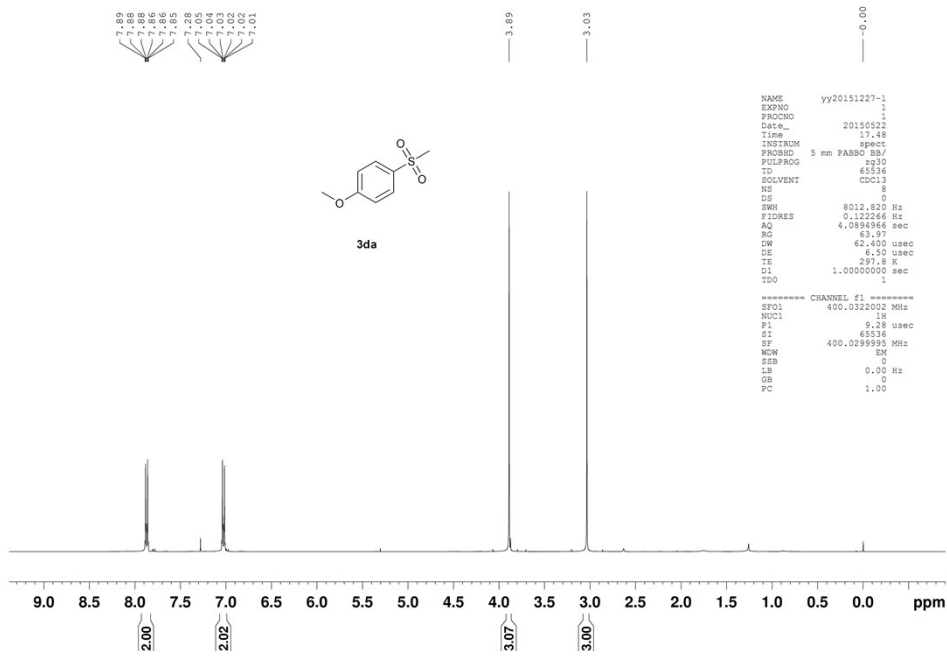

```

NAME yy20151227-1
EXPNO 1
PROCNO 1
Date_ 20150522
Time 17.48
INSTRUM spect
PROBHD 5 mm PABBO BB
PULPROG zg30
TD 65536
SOLVENT ccd13
NS 8
DS 0
SWH 8012.820 Hz
FIDRES 0.122266 Hz
AQ 4.0894666 sec
RG 43.97
DW 62.400 usec
DE 6.50 usec
TE 297.2 K
D1 1.0000000 sec
TD0 1

===== CHANNEL f1 =====
SFO1 400.032002 MHz
NUC1 1H
P1 9.28 usec
SI 65536
SF 400.0299995 MHz
WDW EM
SSB 0
LB 0.00 Hz
GB 0
PC 1.00

```

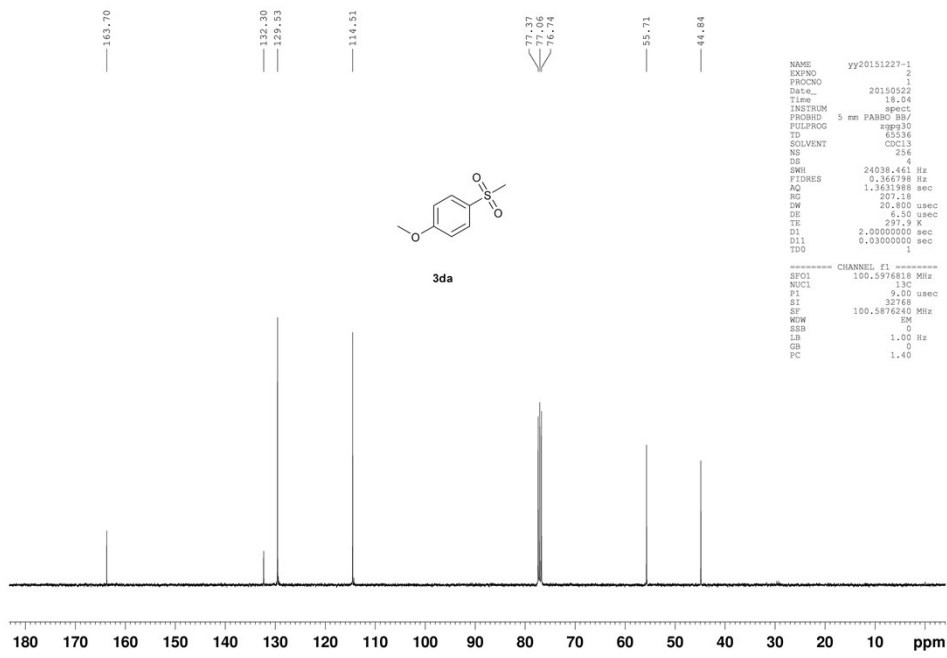

```

NAME yy20151227-1
EXPNO 2
PROCNO 1
Date_ 20150522
Time 18.04
INSTRUM spect
PROBHD 5 mm PABBO BB
PULPROG zgpg30
TD 65536
SOLVENT CDCl3
NS 256
DS 4
SWH 24838.465 Hz
FIDRES 0.366798 Hz
AQ 1.3631988 sec
RG 321.18
DW 20.800 usec
DE 6.50 usec
TE 297.2 K
D1 2.0000000 sec
D11 0.03000000 sec
TD0 1

===== CHANNEL f1 =====
SFO1 100.6261818 MHz
NUC1 13C
P1 9.00 usec
SI 32768
SF 100.6261818 MHz
WDW EM
SSB 0
LB 1.00 Hz
GB 0
PC 1.40

```

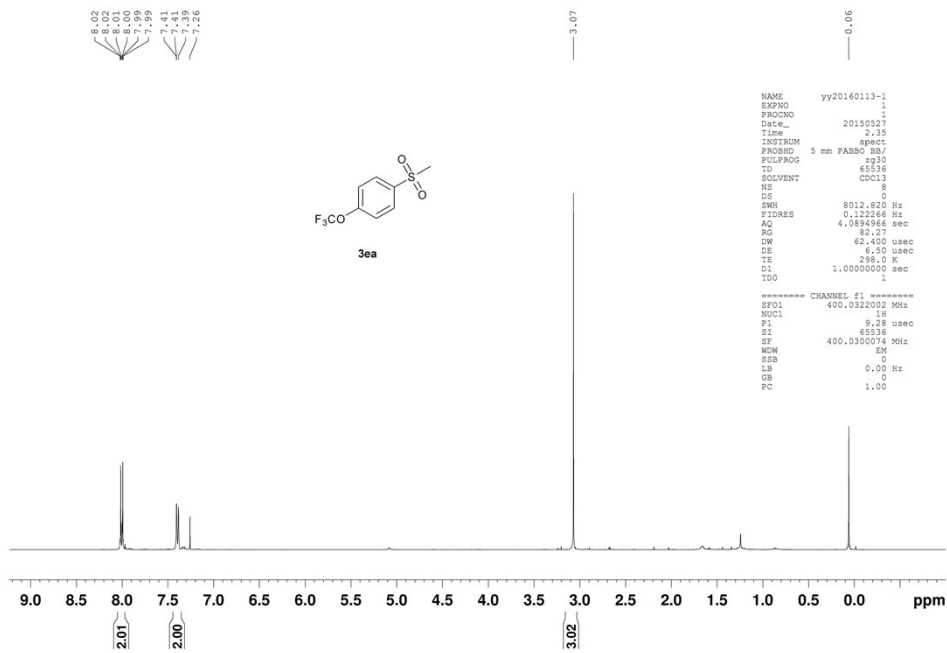

```

NAME yy20160113-1
EXPNO 1
PROCNO 1
Date_ 20150527
Time 2.35
INSTRUM spect
PROBHD 5 mm PABBO BB/
PULPROG zg30
TD 65536
SOLVENT cdcl3
NS 8
DS 0
SWH 8012.820 Hz
FIDRES 0.122266 Hz
AQ 4.0894966 sec
RG 32.27
DW 62.400 usec
DE 6.50 usec
TE 298.0 K
D1 1.0000000 sec
TD0 1
----- CHANNEL f1 -----
SFO1 400.032002 MHz
NUC1 1H
P1 9.28 usec
SI 65536
SF 400.0300014 MHz
WDW EM
SSB 0
LB 0.00 Hz
GB 0
PC 1.00

```

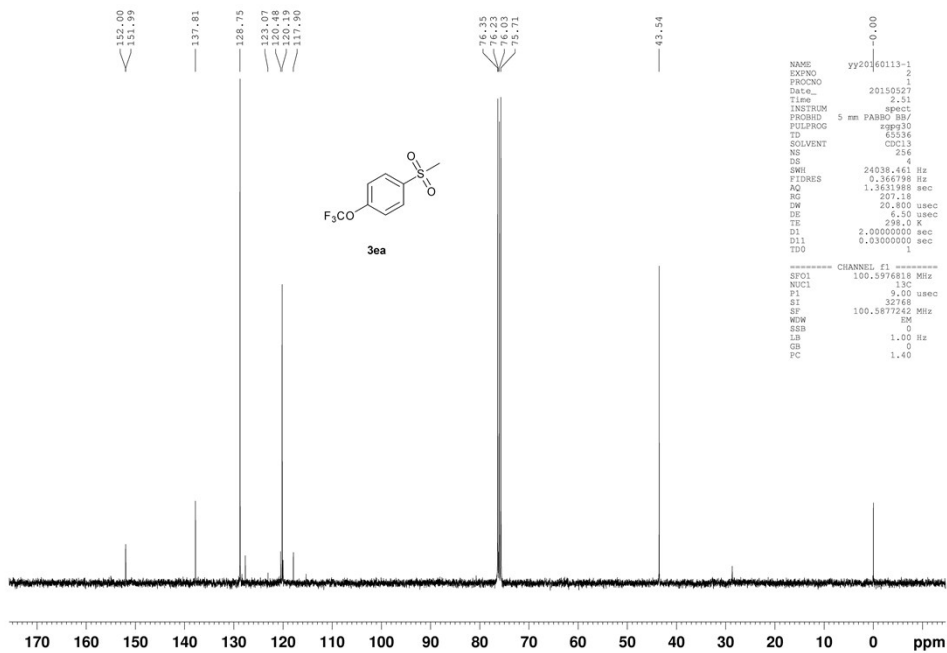

```

NAME yy20160113-1
EXPNO 2
PROCNO 1
Date_ 20150527
Time 2.51
INSTRUM spect
PROBHD 5 mm PABBO BB/
PULPROG zgpg30
TD 65536
SOLVENT cdcl3
NS 256
DS 4
SWH 24838.465 Hz
FIDRES 0.366798 Hz
AQ 1.3631988 sec
RG 321.18
DW 20.800 usec
DE 6.50 usec
TE 298.0 K
D1 2.0000000 sec
D11 0.03000000 sec
TD0 1
----- CHANNEL f1 -----
SFO1 100.6276818 MHz
NUC1 13C
P1 9.00 usec
SI 32768
SF 100.6277242 MHz
WDW EM
SSB 0
LB 1.00 Hz
GB 0
PC 1.40

```





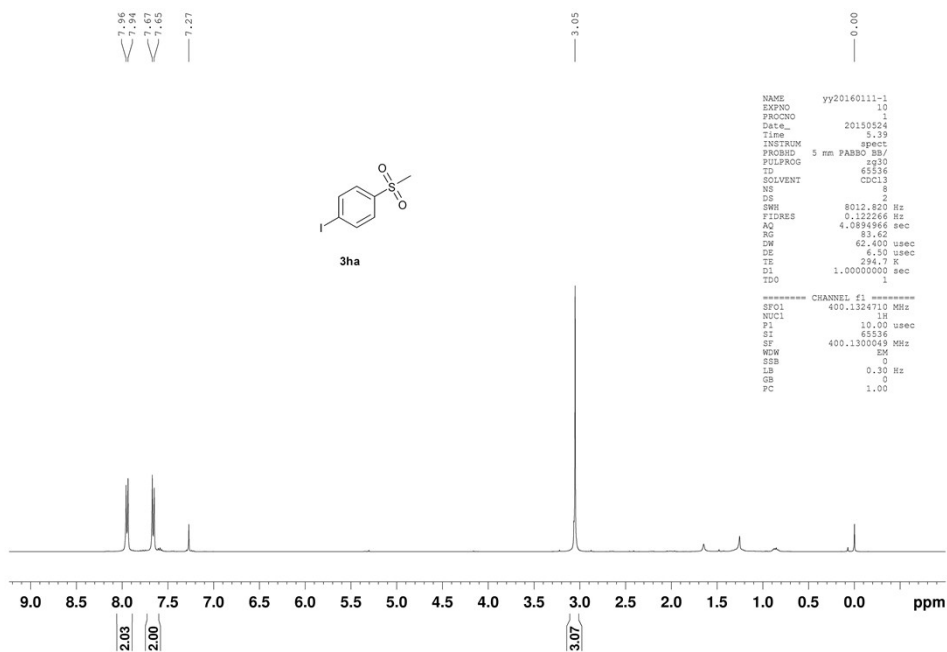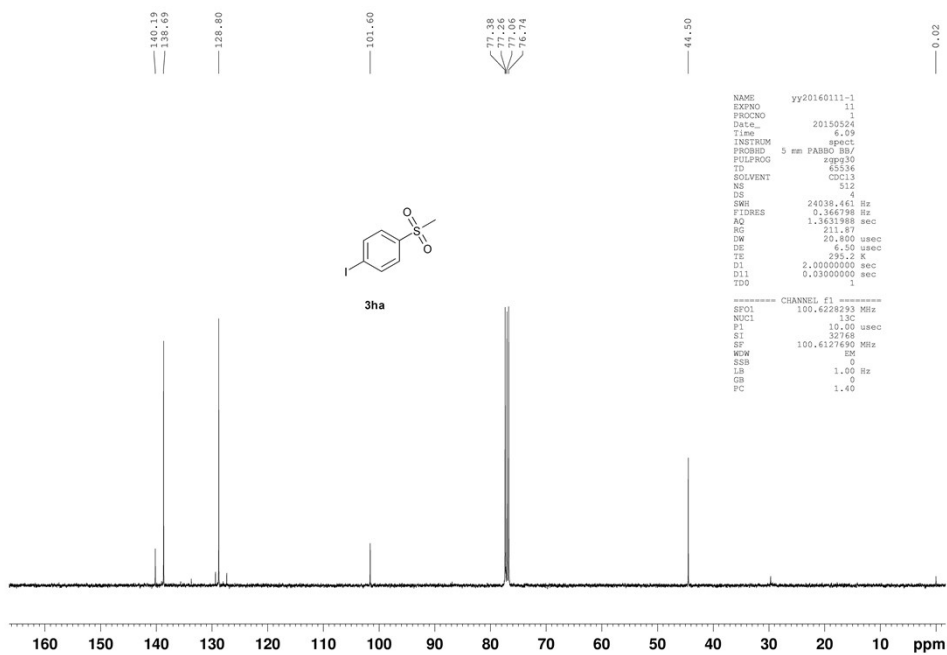

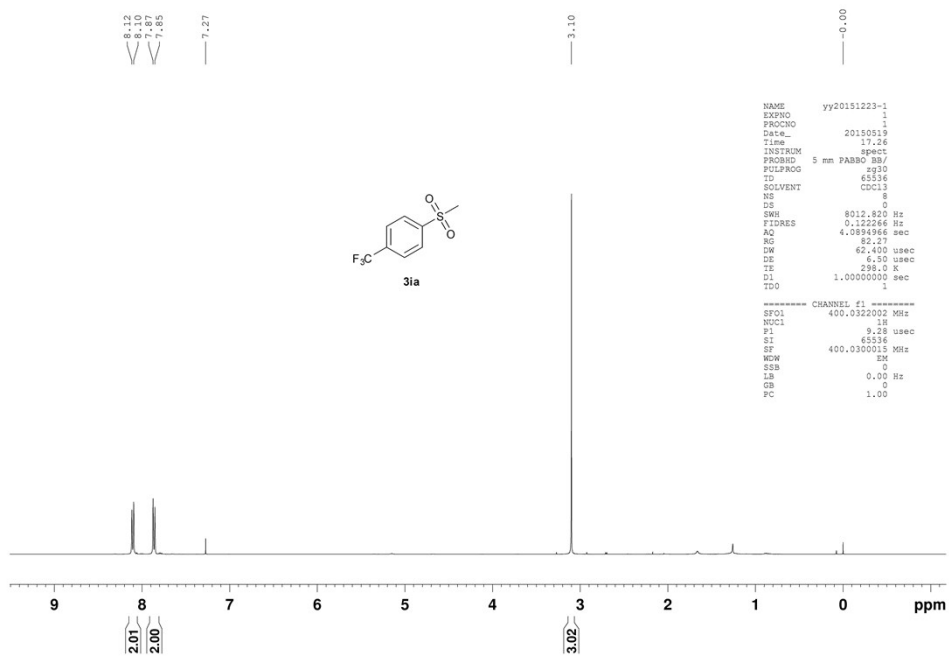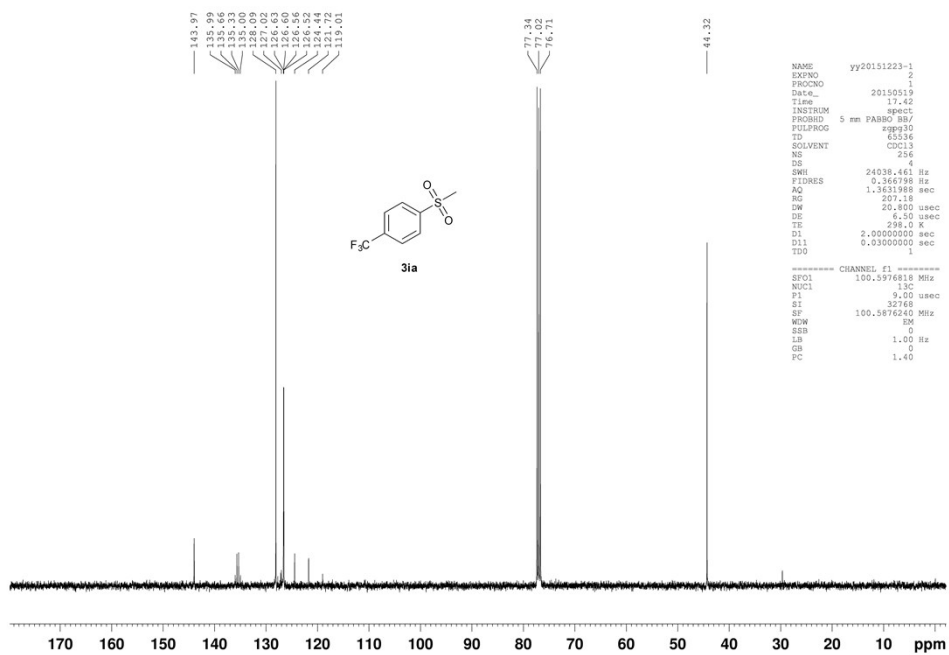



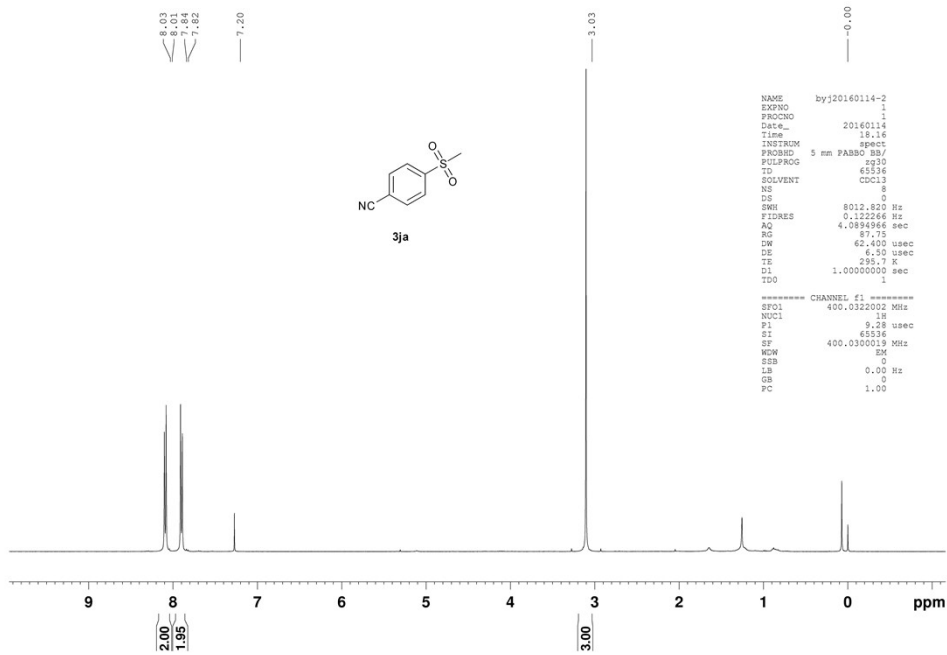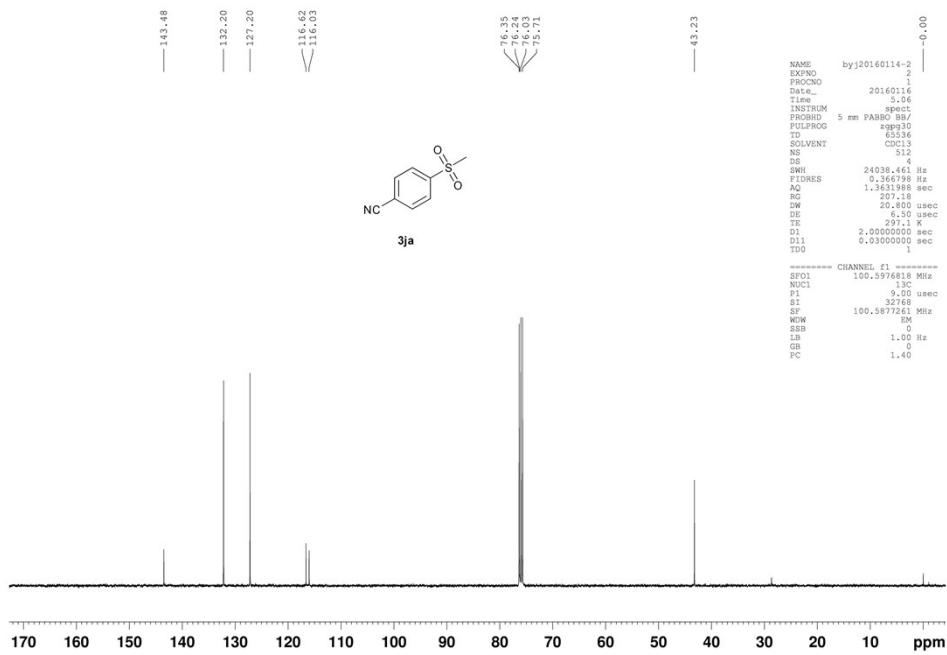

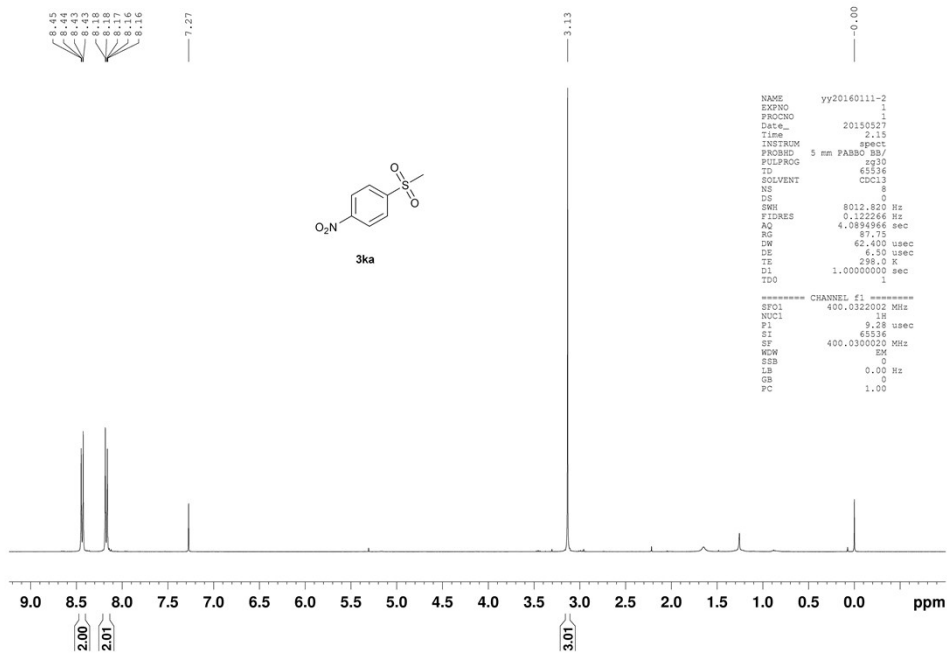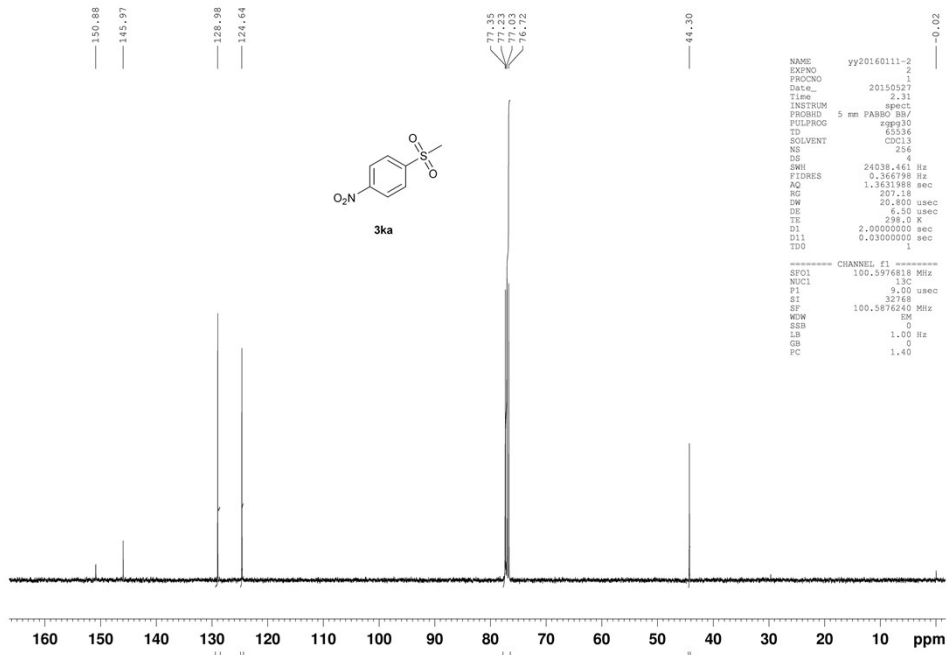

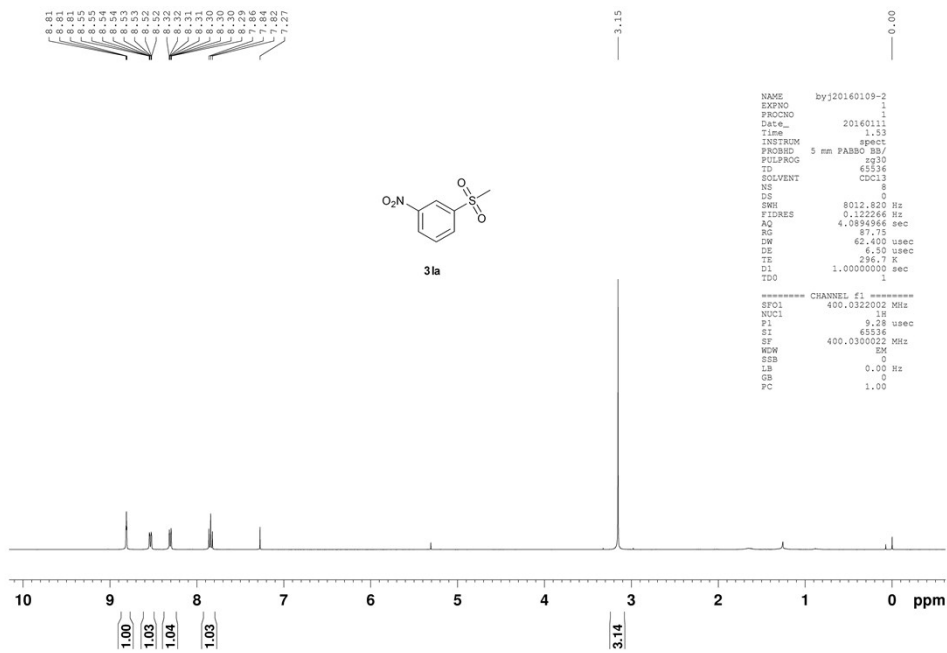

```

NAME      byj20160109-2
EXPNO    1
PROCNO   1
Date_    20160111
Time     1.53
INSTRUM  spect
PROBHD   5 mm PABBO BB/
PULPROG  zg30
TD        65536
SOLVENT  cdcl3
NS        8
DS        0
SWH       8012.820 Hz
FIDRES   0.122266 Hz
AQ        4.0894966 sec
RG         27.75
DW        62.400 usec
DE        6.50 usec
TE        296.7 K
D1        1.0000000 sec
TDD       1
===== CHANNEL f1 =====
SFO1     400.032002 MHz
NUC1      1H
P1        9.28 usec
SI        65536
SF        400.030002 MHz
WDW       EM
SSB       0
LB        0.00 Hz
GB        0
PC        1.00

```

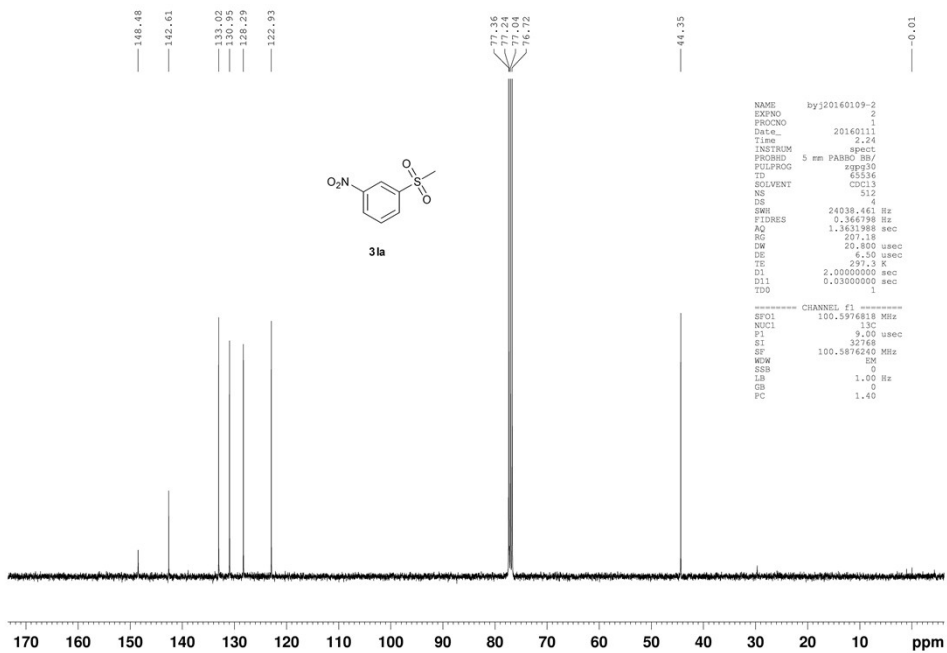

```

NAME      byj20160109-2
EXPNO    2
PROCNO   1
Date_    20160111
Time     2.24
INSTRUM  spect
PROBHD   5 mm PABBO BB/
PULPROG  zgpg30
TD        65536
SOLVENT  cdcl3
NS        4
DS        0
SWH       24038.461 Hz
FIDRES   0.366798 Hz
AQ        1.3531988 sec
RG         207.18
DW        20.800 usec
DE        6.50 usec
TE        291.3 K
D1        2.0000000 sec
D11       0.0300000 sec
TDD       1
===== CHANNEL f1 =====
SFO1     100.5976818 MHz
NUC1      13C
P1        9.00 usec
SI        32768
SF        100.5876240 MHz
WDW       EM
SSB       0
LB        1.00 Hz
GB        0
PC        1.40

```

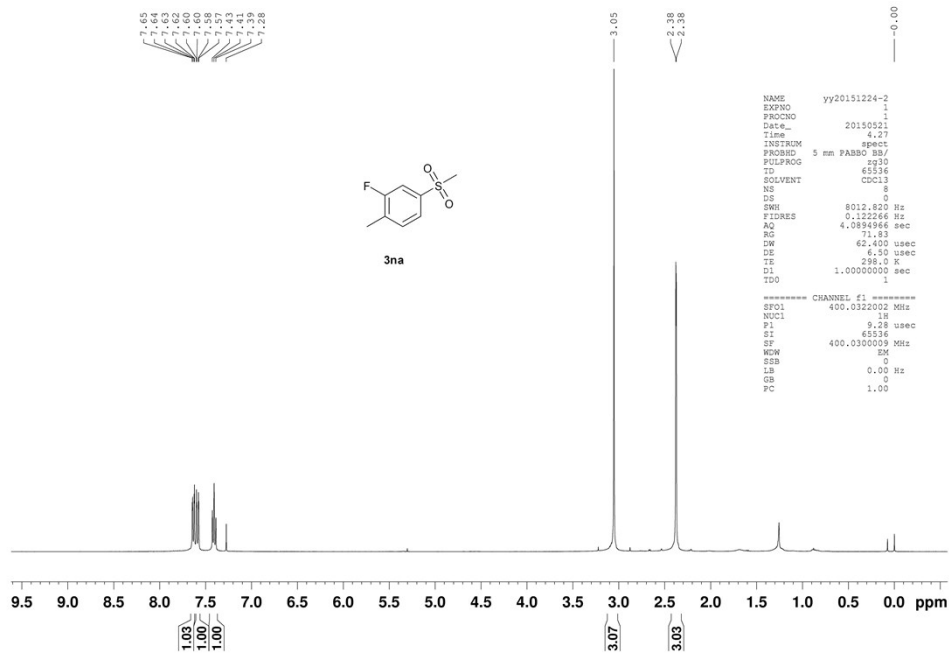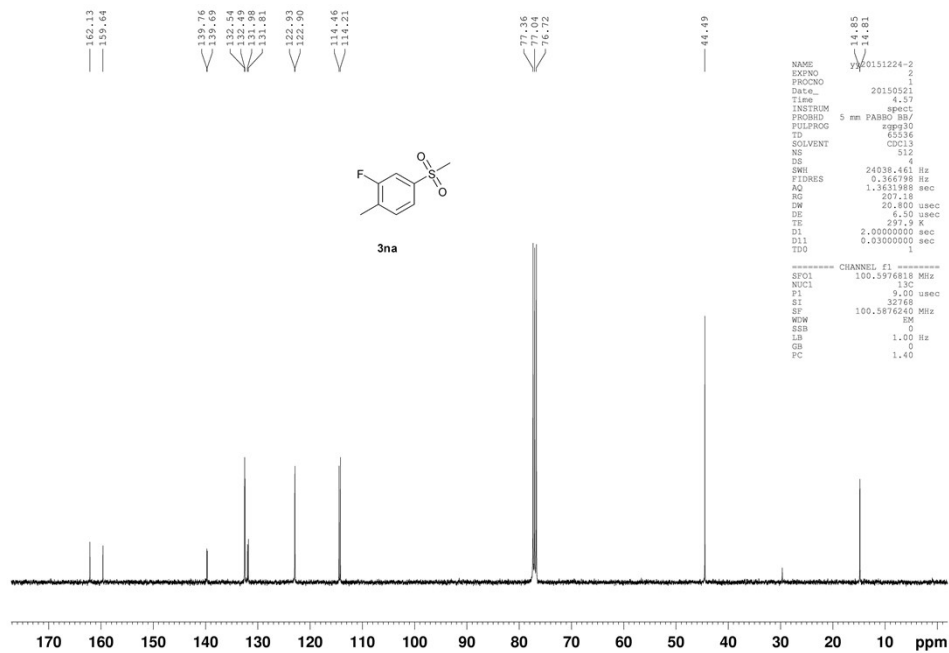

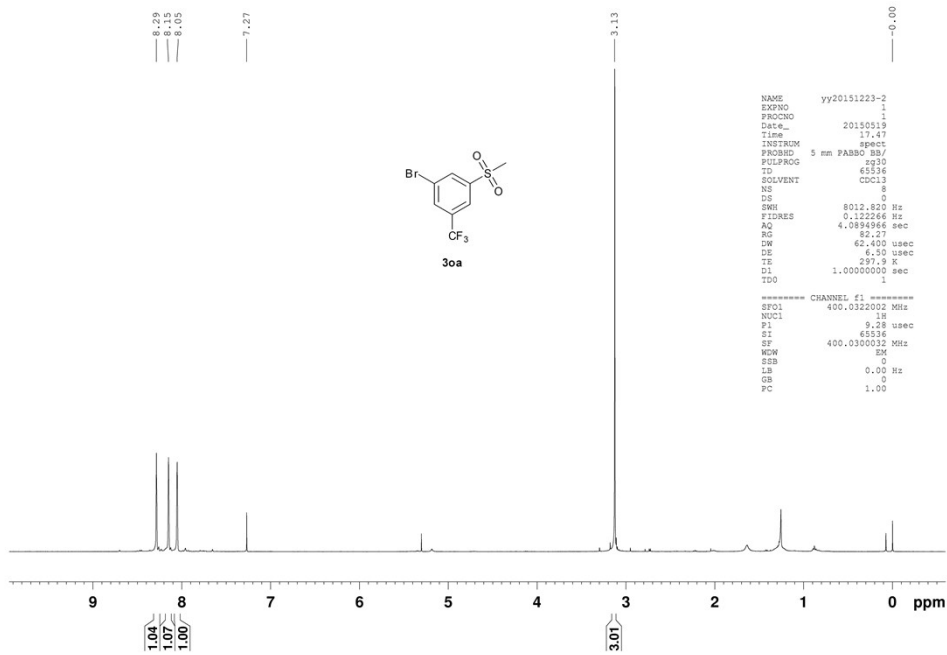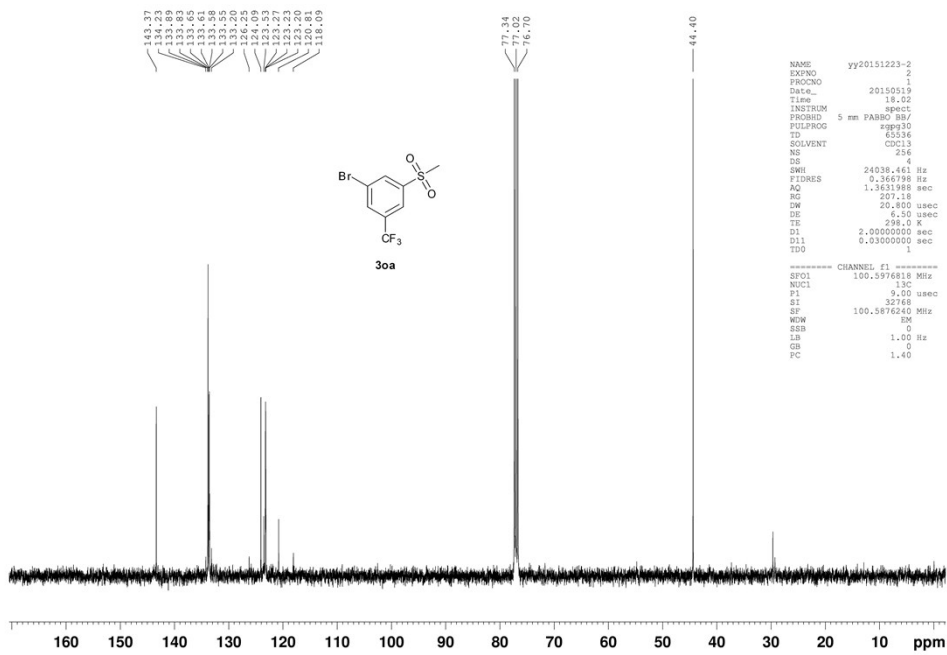

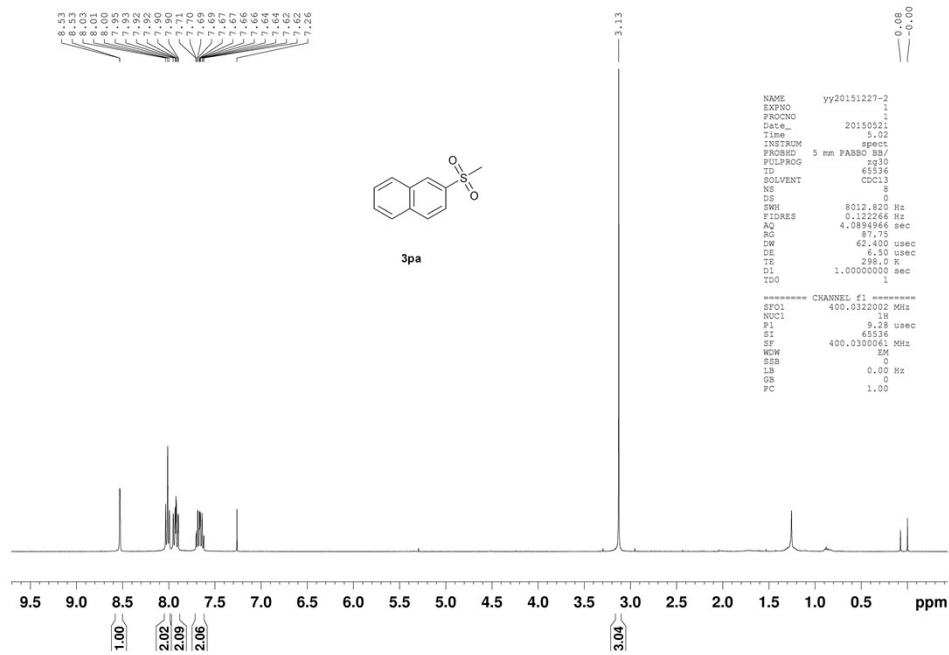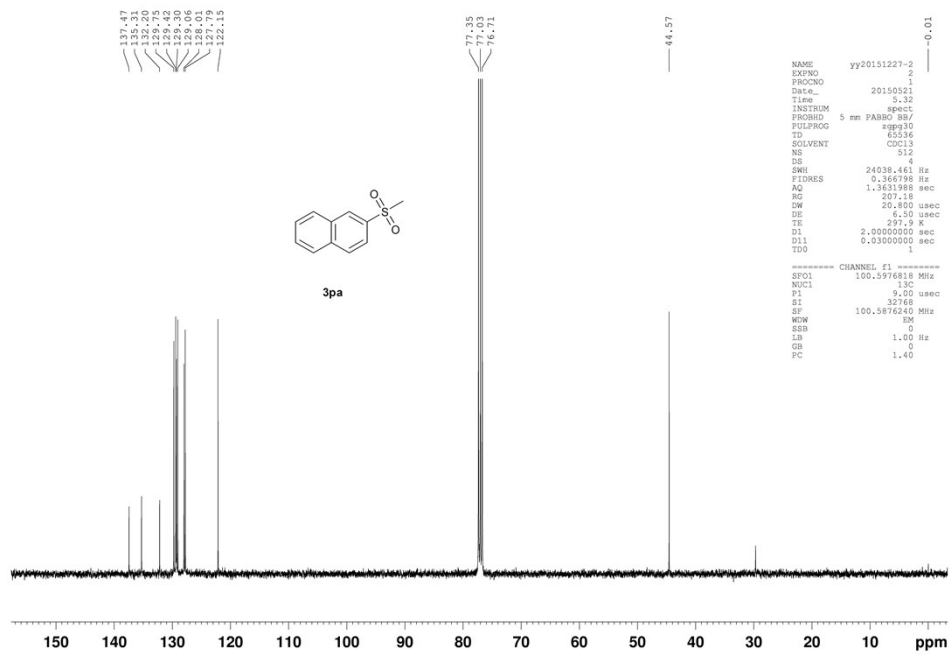

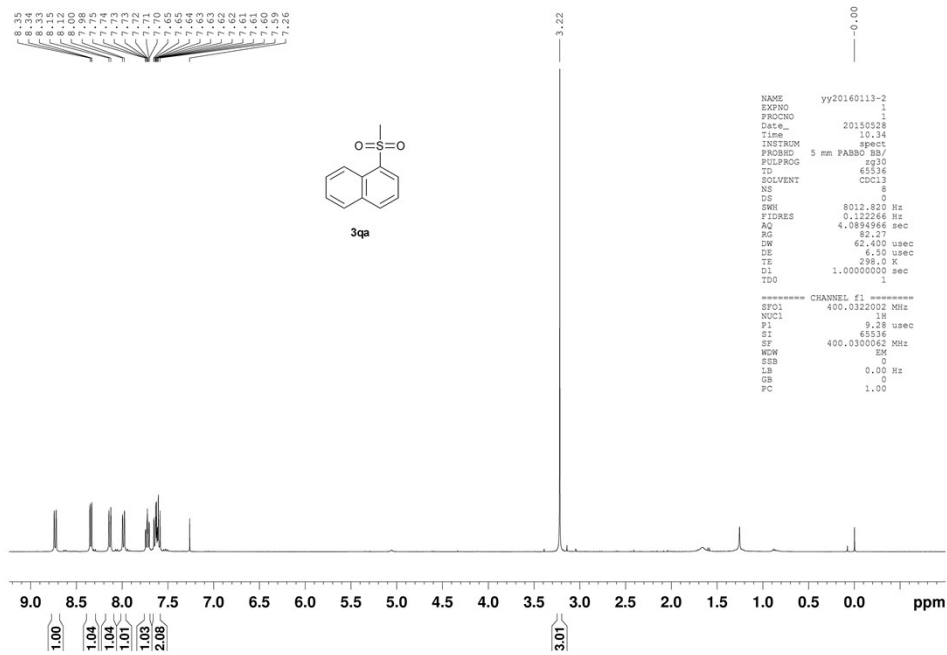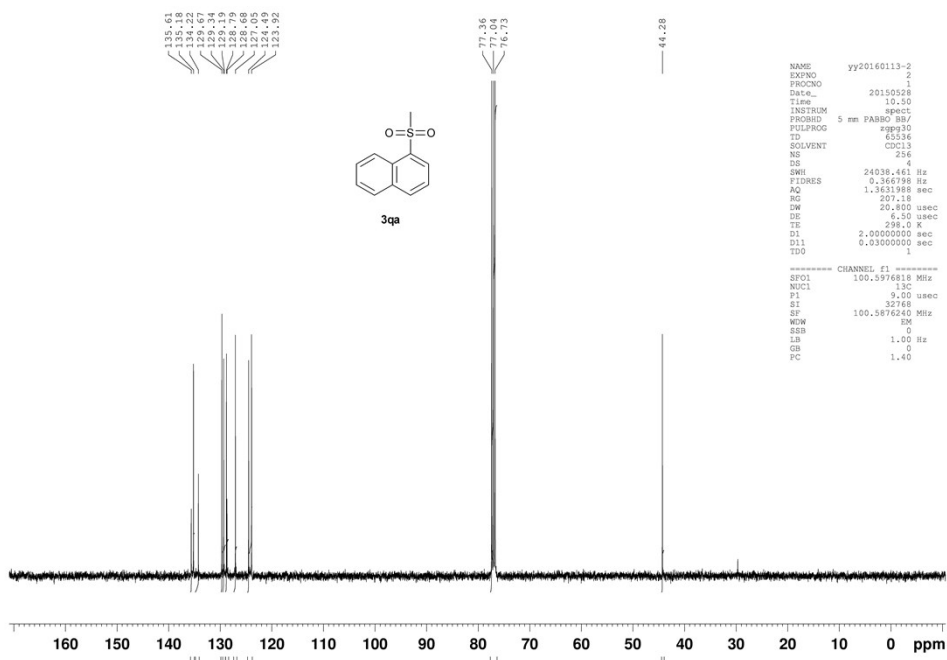

```

NAME yy20160113-2
EXPNO 1
PROCNO 1
Date_ 20150528
Time 10.34
INSTRUM spect
PROBHD 5 mm PABBO BB/
PULPROG zg30
TD 65536
SOLVENT cdcl3
NS 8
DS 0
SWH 8012.820 Hz
FIDRES 0.122266 Hz
AQ 4.0894966 sec
RG 32.27
DW 62.400 usec
DE 6.50 usec
TE 298.0 K
D1 1.0000000 sec
TD0 1
----- CHANNEL f1 -----
SFO1 400.032002 MHz
NUC1 1H
P1 9.28 usec
SI 65536
SF 400.0300062 MHz
WDW EM
SSB 0
LB 0.00 Hz
GB 0
PC 1.00

```

```

NAME yy20160113-2
EXPNO 2
PROCNO 1
Date_ 20150528
Time 10.50
INSTRUM spect
PROBHD 5 mm PABBO BB/
PULPROG zgpg30
TD 65536
SOLVENT CDCl3
NS 256
DS 4
SWH 24838.465 Hz
FIDRES 0.366798 Hz
AQ 1.3631988 sec
RG 301.18
DW 20.800 usec
DE 6.50 usec
TE 298.0 K
D1 2.0000000 sec
D11 0.03000000 sec
TD0 1
----- CHANNEL f1 -----
SFO1 100.6261818 MHz
NUC1 13C
P1 9.00 usec
SI 32768
SF 100.6261818 MHz
WDW EM
SSB 0
LB 1.00 Hz
GB 0
PC 1.40

```

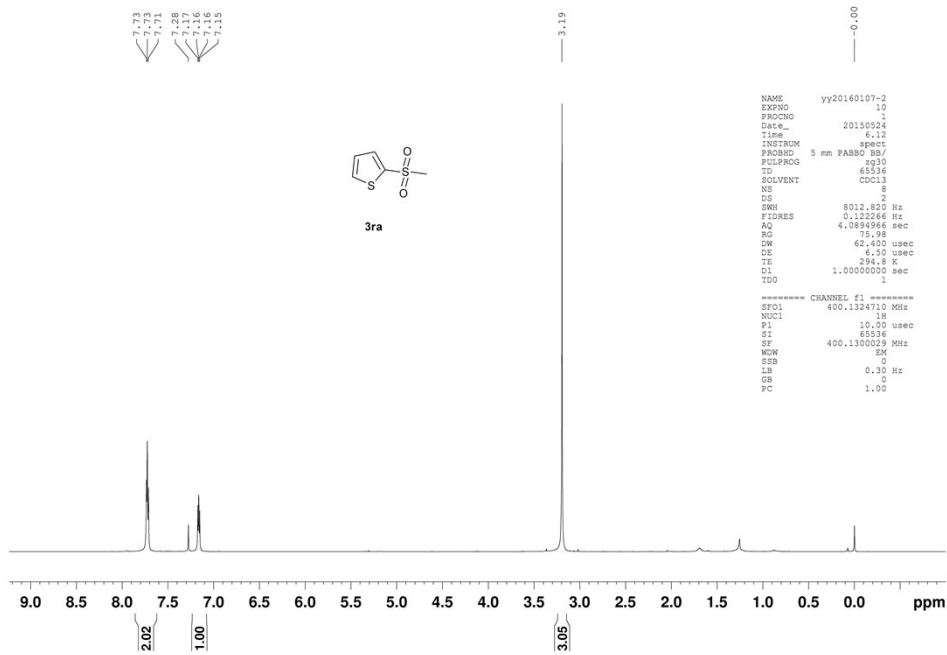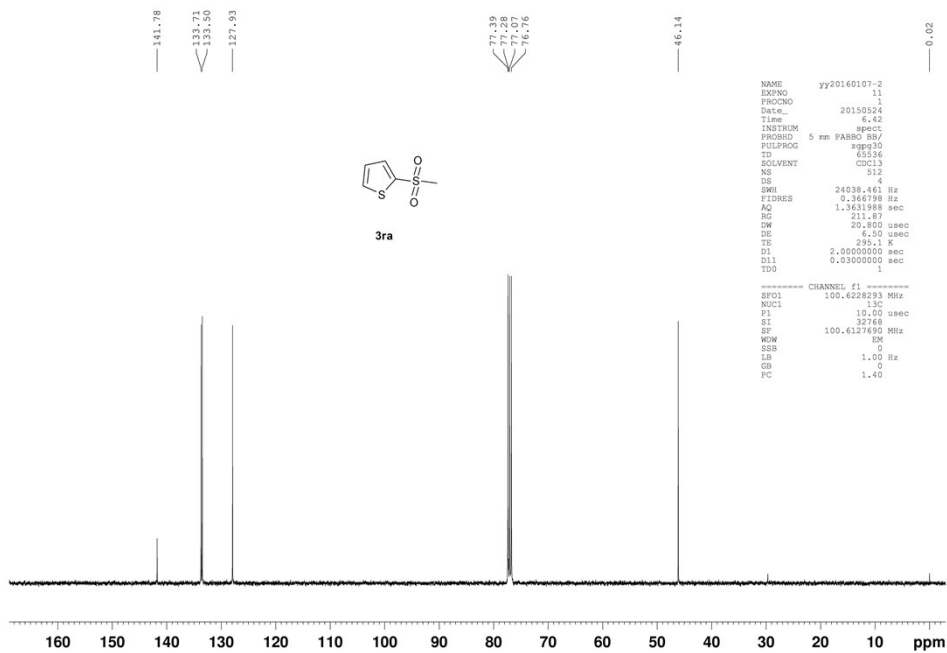



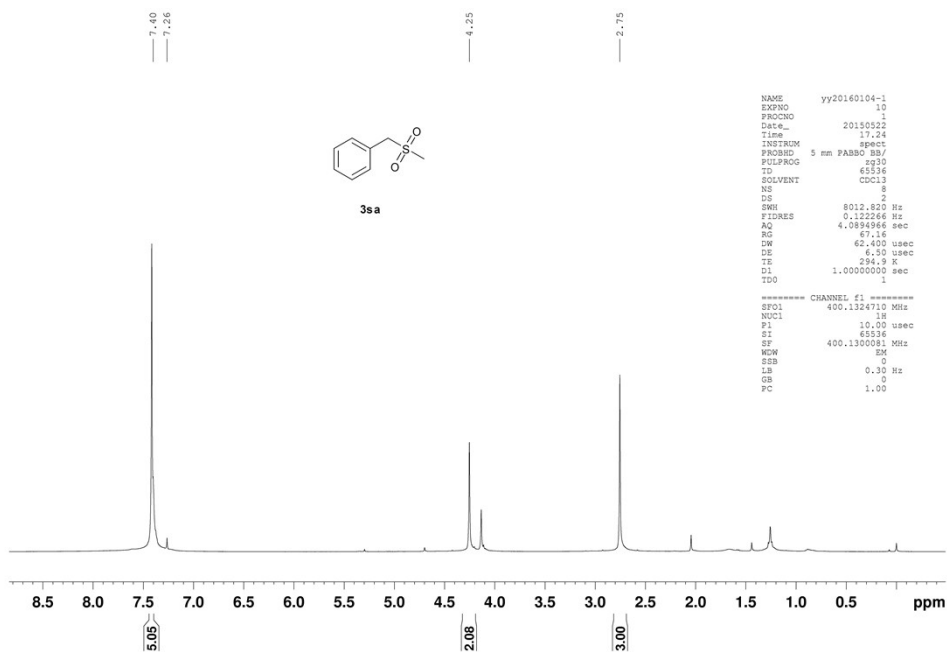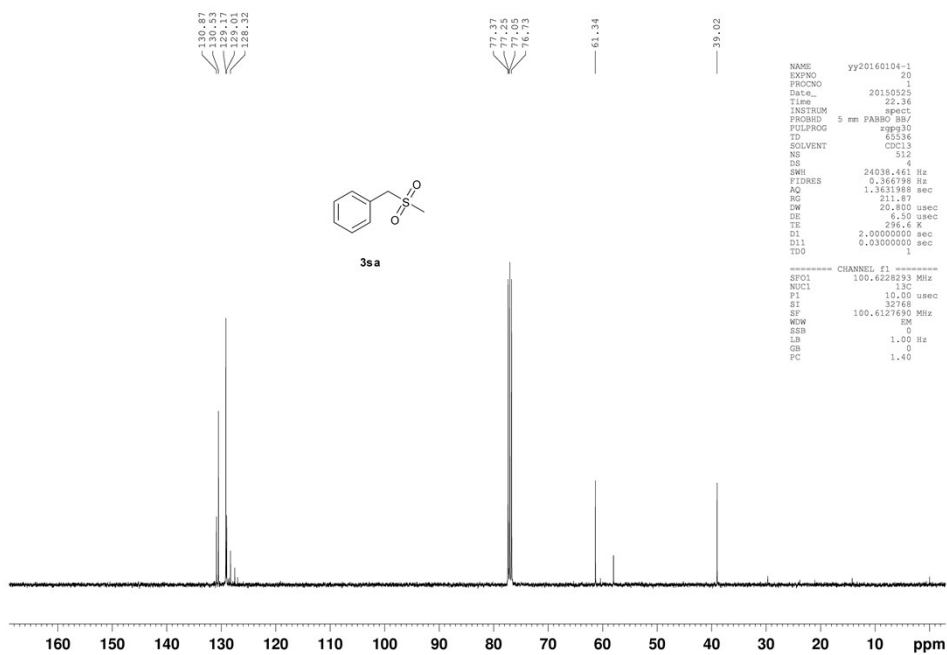

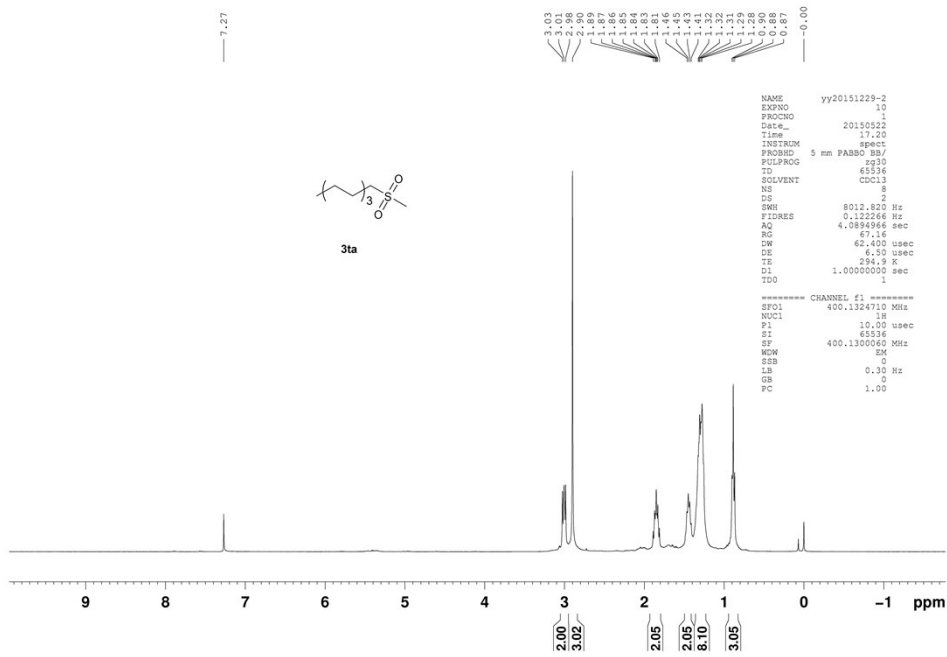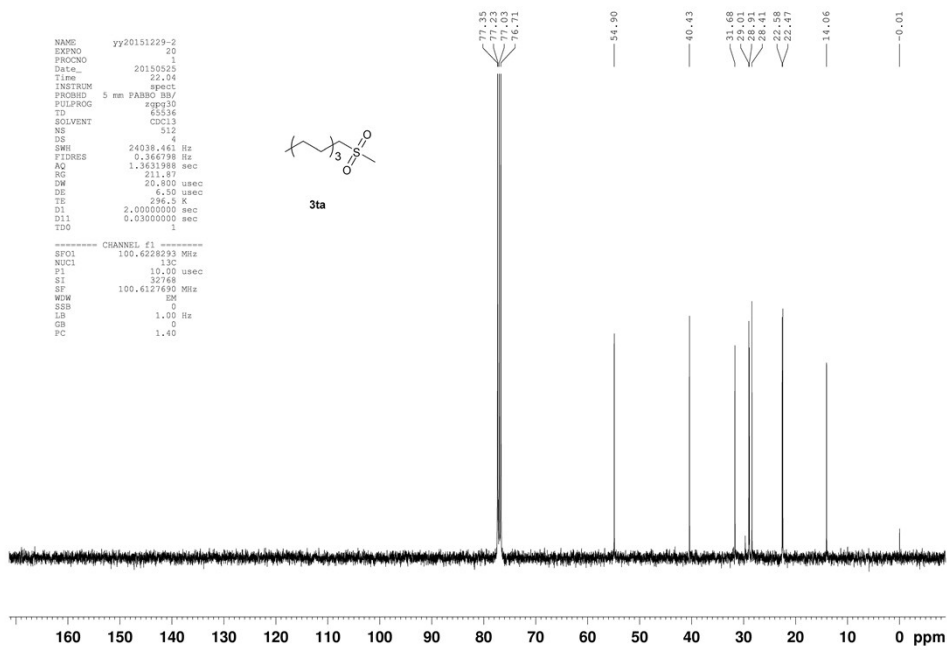

Supplement: c6gc03142k1.pdf [file c6gc03142k1.pdf]
